# Supplementary material
Source: publisher figshare collection journal article supplement (https://frontiersin.figshare.com/ndownloader/files/25644527)
Supplement: Supplementary file [file 25644527]

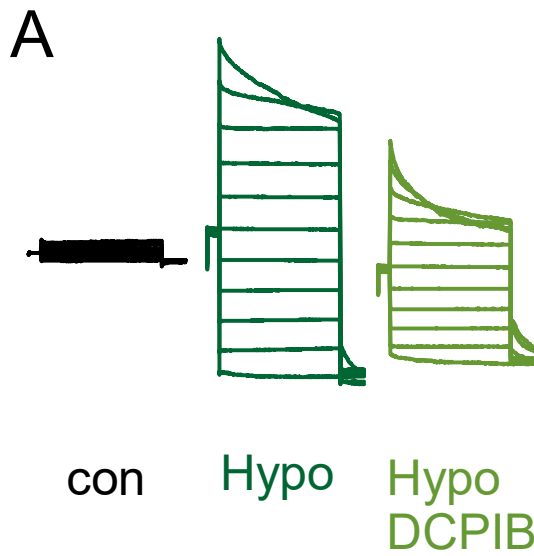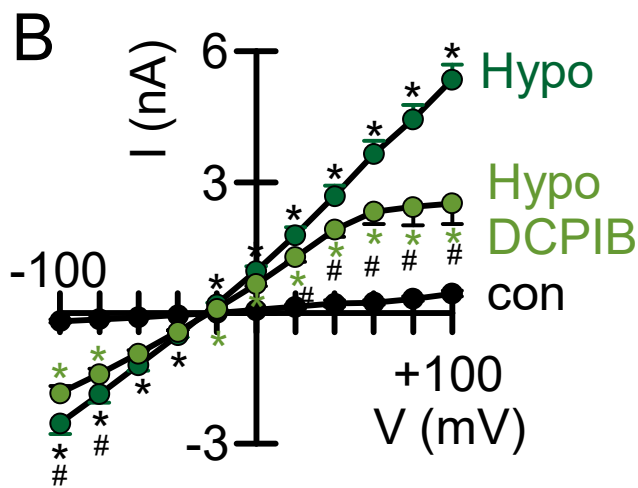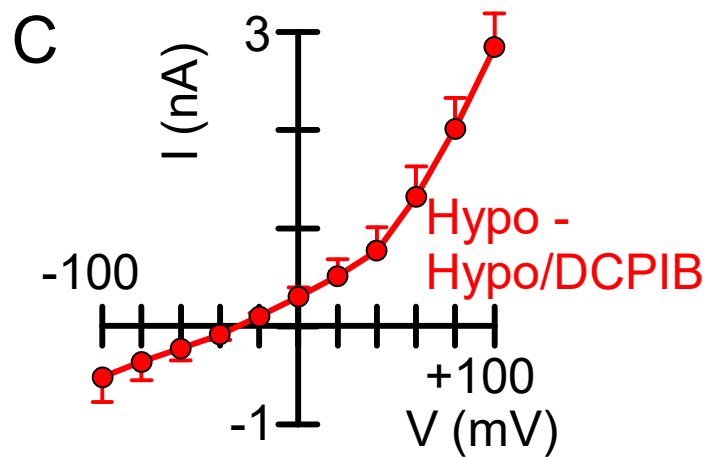

**Supplementary Fig. 2:** A) Whole cell patch clamp recordings showing activation of VRAC in HT<sub>29</sub> cells by hypotonic (200 mosm/l) cell swelling. VRAC was inhibited by DCPIB at depolarized clamp voltages but showed relatively little effect at negative clamp voltages. B) Corresponding current voltage relationships. Mean  $\pm$  SEM ( $n = 6$ ). C) I/V curve for remaining currents after subtracting  $I_{\text{Hypo/DCPIB}}$  from  $I_{\text{Hypo}}$ . \*significant activation by Hypo (paired t-test,  $p < 0.0000007$  for both). #significant inhibition by DCPIB (paired t-test,  $p < 0.0006$ ).
